patients had tolerated a  $\beta$ -lactam agent since the listed allergy. Overall, 70% of patients were hospitalized from the ED. Similar trends in antibiotic use were observed at admission – decreased FQs (38% pre vs. 27% post,  $P = 0.059$ ), increased cephalosporins (24% pre vs. 38.4% post,  $P = 0.021$ ). Two patients (1.6%) experienced a nonsevere reaction within 24 hours of  $\beta$ -lactam administration post-allergy assessment.

**Conclusion.** Pharmacist-driven PCN allergy assessment at the point of prescription in the ED was safe and effective at improving the use of guideline-preferred antibiotics and reducing FQ use.

**Disclosures.** All authors: No reported disclosures.

#### 994. Effect on B-lactam Usage Following Implementation of Clinical Pharmacy Services to Improve B-lactam Allergy History Documentation

Nicole Harrington, Pharm D, BCPS AQ-ID<sup>1</sup>; Victoria Drews, Pharm D<sup>1</sup>; Jillian Laude, Pharm D, BCPS<sup>1</sup>; Julianne Care, Pharm D<sup>1</sup>; Donna Walsh, Pharm D<sup>1</sup>; <sup>1</sup>Christiana Care Health System, Newark, Delaware,

**Session:** 129. Antibiotic Stewardship: Allergy Evaluation

Friday, October 4, 2019: 12:15 PM

**Background.** The purpose of this study was to implement a pharmacy-initiated  $\beta$ -lactam allergy assessment and to determine its impact on antibiotic prescribing patterns. Avoiding the use of  $\beta$ -lactams due to a documented allergy may lead to inferior treatment outcomes, particularly for indications where  $\beta$ -lactams are preferred.

**Methods.** This performance improvement study was conducted at a large community-based academic healthcare system in Delaware. A  $\beta$ -lactam allergy algorithm was developed to guide allergy assessments and categorize patients as low risk for possible reaction, possible type 1 reaction or insufficient information. Pharmacy residents and clinical pharmacists were educated on how to conduct the assessments, which were then performed on inpatients with a  $\beta$ -lactam allergy that were prescribed a non- $\beta$ -lactam antibiotic from December 2018 through March 2019. The primary outcome of this study was the percentage of patients ordered a  $\beta$ -lactam antibiotic pre- and post-implementation of the assessment. Secondary outcomes included: allergy assessment classifications, number of patients with an allergy discrepancy, percentage of patients switched to a  $\beta$ -lactam antibiotic, development of a reaction, and the number of allergy consultations ordered. The primary endpoint was analyzed using a Chi-square test.

**Results.** The percentage of patients prescribed a  $\beta$ -lactam pre- and post-implementation was 59% and 63%, respectively ( $P = 0.055$ ). A total of 101 patients had an allergy assessment performed. Assessments resulted in 45% of patients categorized as low risk, 45% as possible type 1 reaction and 10% as insufficient information. In summary, 33% of patients were changed to a  $\beta$ -lactam following completion of an assessment and zero patients experienced a reaction. Additionally, 69% of patients had an allergy discrepancy in their electronic medical record, and four patients received an allergy consultation.

**Conclusion.** The use of clinical pharmacy services to perform  $\beta$ -lactam allergy assessments was successful, as the majority of patients with a low-risk allergy classification were changed to a  $\beta$ -lactam antibiotic. The next steps for this project include engagement of infectious diseases and allergy specialists to further optimize clinical practice.

**Disclosures.** All authors: No reported disclosures.

#### 995. A quality improvement initiative to increase penicillin allergy clarification and decrease aztreonam usage

Peggy rahbani, PharmD<sup>1</sup>; Inova Mount Vernon Hospital, Arlington, Virginia,

**Session:** 129. Antibiotic Stewardship: Allergy Evaluation

Friday, October 4, 2019: 12:15 PM

**Background.** Penicillin (PCN) allergy is a serious adverse reaction that prevents the use of first-line therapy. 10% of the population reports a PCN allergy; however, less than 1% is truly allergic. Elimination of false allergies significantly impacts patient's lives and decreases antimicrobial resistance and cost. Inova Mount Vernon Hospital (IMVH) has reported lack of pharmacist's interventions in allergy clarification and counseling thus leading to an increase in aztreonam usage.

**The primary objective of the study was to increase pharmacist's interventions in patient allergy clarification and counseling.** The secondary objective was to decrease aztreonam duration of therapy (DOT) by 10%.

**Methods.** This project was conducted and monitored M-F on the pharmacy true north board March-December 2018. The initial step was to create a standard work and educate pharmacists on individualized PCN allergy patients interviewing and counseling. Pharmacist's interventions tracking were made using the electronic reporting system. To quantify aztreonam usage, duration of therapy (DOT/1000) was collected during the study period and compared with data from 2017.

**Results.** During the study implementation, a total of 551 interventions pertaining to PCN allergy were documented by pharmacists between March-November 2018, compared with only 72 interventions made in March-November 2017 (7x increase,  $P < 0.005$ ). Pharmacists while intervening clarified the allergy added the severity of the reaction, documented whether patients recently tolerated any PCN-based antibiotics, and de-labeled patients when appropriate. Allergy assessments lead to a decrease in aztreonam DOT/1000 by 12% in 2018 compared with 2017 and the overall antimicrobial stewardship goal was achieved.

**Conclusion.** Pharmacist's interventions in allergy clarification helped with antibiotic de-escalation, improved safety, and de-labeled patients when appropriate. This initiative also increased physician and nursing awareness of the importance of

clarifying PCN allergies. After successfully hardwiring this practice the pharmacy is partnering with nursing to implement PCN skin testing service at IMVH.

**Disclosures.** All authors: No reported disclosures.

#### 996. Impact of Penicillin Allergy Labels on Carbapenem Use in a Multi-Center Study

Dorothy Ling, MBBS<sup>1</sup>; Jessica Seidelman, MD, MPH<sup>2</sup>; Elizabeth Dodds Ashley, PharmD, MHS<sup>1</sup>; Angelina Davis, PharmD, MS<sup>3</sup>; April Dyer, PharmD, MBA, MSCR<sup>1</sup>; Travis M. Jones, PharmD<sup>1</sup>; Melissa D. Johnson, PharmD, MHS<sup>1</sup>; Michael E. Yarrington, MD<sup>1</sup>; Deverick J. Anderson, MD, MPH<sup>1</sup>; Daniel J. Sexton, MD<sup>1</sup>; Rebekah W. Moehring, MD, MPH<sup>1</sup>; <sup>1</sup>Duke Center for Antimicrobial Stewardship and Infection Prevention, Raleigh, North Carolina; <sup>2</sup>Duke University, Durham, North Carolina; <sup>3</sup>Duke Antimicrobial Stewardship Outreach Network, Durham, North Carolina,

**Session:** 129. Antibiotic Stewardship: Allergy Evaluation

Friday, October 4, 2019: 12:15 PM

**Background.** Antibiotic allergy labels lead to excess exposure to broad-spectrum antibiotics and can result in patient harm. We aimed to describe the prevalence of penicillin allergy labels (PAL) across a variety of hospital settings and its association with carbapenem exposure.

**Methods.** We performed a retrospective cohort analysis of inpatient admissions from 14 hospitals in the Duke Antimicrobial Stewardship Outreach Network (DASON) and Duke Health System from 2016 to 2018. Data were collected from the DASON central database which is derived from electronic health record extracts. PAL was defined from drug allergy documentation indicating any reaction to penicillin or its related agents, but did not include labels for other  $\beta$ -lactam agents (e.g., cephalosporin). Carbapenem exposure was defined as a binary variable indicating receipt of at least one dose of meropenem, ertapenem, doripenem or imipenem on an inpatient unit. The association between PAL and carbapenem exposure was assessed using multivariable logistical regression with candidate covariates including age, gender, comorbidity score, and exposure to intensive care or hematology/oncology unit. Hospital-level PAL prevalence was defined as the percentage of inpatient admissions. Hospital-level carbapenem use rates were assessed as days of therapy (DOT) per 1000 patient-days and stratified by PAL to understand the portion of use associated with PAL.

**Results.** Of the 727,168 admissions included in this study, 84,033 (11.6%) patients had a PAL. The majority of admissions with documented PAL were in patients >65 years old (47.9%,  $n = 40,240$ ) and female (57.8%,  $n = 418,472$ ). PAL was associated with a 2-fold higher risk of receipt of carbapenem (adjusted odds ratio 2.13, 95% CI 0.89–2.40,  $P < 0.0001$ ). PAL prevalence varied among hospitals (median 14%, range 5–20%). Hospitals with antibiotic allergy-focused stewardship programs (ASP) had a similar PAL prevalence (median 13.8 vs. 15.9%,  $P = 0.08$ ), but the percent of carbapenem DOT used in patients with PAL was similar (median 23% vs. 24%,  $P = 0.6$ ).

**Conclusion.** PAL was associated with increased carbapenem exposure on the patient level. Allergy-focused ASP activities may affect PAL but it is unclear whether it reduces carbapenem use based on these observational data.

**Disclosures.** All authors: No reported disclosures.

#### 997. Practical partnering of Antibiotic Stewardship and Allergy to address referrals to Penicillin allergy debunking clinic at a VA Medical Center

Dipa Sheth, MD<sup>1</sup>; Ayne Adenew, PharmD<sup>1</sup>; Raghava Charya, MD<sup>1</sup>; Judy Santelices, RN<sup>1</sup>; Angelike P. Liappis, MD, FIDSA<sup>1</sup>; <sup>1</sup>Washington DC Veterans Affairs Medical Center, WASHINGTON, DC

**Session:** 129. Antibiotic Stewardship: Allergy Evaluation

Friday, October 4, 2019: 12:15 PM

**Background.** The majority of Penicillin (PCN) allergies can be “debunked.” During acute medical care, opportunities to refer for formal evaluation are often overlooked, hampered by medication-interactions and lack of time and resources for bedside testing. Frequently, inpatients are not referred for PCN debunking evaluations (PCN-DE). Antimicrobial Stewardship Teams (ASTs) who partner with Allergy Clinical Teams (ACTs) can work collaboratively to target those who would benefit from de-labeling and are unlikely to otherwise be referred for formal evaluation.

**Methods.** The DCVAMC is an urban 240 bed 1a complexity acute and LTC teaching hospital with both on-site AST and well-established ACT.  $\beta$ -lactam allergy was tracked by the AST in inpatient, outpatient and long-term care setting utilizing a clinical surveillance system (TheraDoc, DSS Inc.) and allergy education was incorporated into prospective auditing rounds. PCN-DE involved face-face visit with an Allergist and careful history, chart/medication review. Option for skin testing (Pre-Pen, ALK Abello) with/without oral challenge performed at the discretion of ACT. EMR was altered to reflect results.

**Results.** We collaborated to develop a PCN-DE outpatient Allergy Clinic on the hospital campus. 2,564 designed  $\beta$ -lactam allergy alerts were identified as part of routine AST workflow prior to the initiation of the clinic in October 2017. Referrals resulted from AST prospective audits, consults to ACT and by surveillance of historical allergy history among acute and LTC admissions. Providers, including trainees, were engaged through education and encouraged to place outpatient referrals at the time of discharge or upon follow-up. ACT evaluated patients in groups of 2–3/session, roughly one clinic/month. Mean age of patients tested 56.3y (24–80y) with 35% >65y; to date, (19/26) 73% have been successfully de-labeled

**Conclusion.** The success in de-labeling after formal evaluation is well established. Developing working relationships with allergists and encouraging providers to recognize often overlooked opportunities to refer to existing or newly established clinics is easily adopted by ASTs. In conjunction with screening, targeted education and referral to PCN-DE as a part of routine stewardship workflow has practical and immediate benefits.

**Disclosures.** All authors: No reported disclosures.

### 998. Challenging Penicillin Allergies: Pharmacist led program in a community hospital

Radha Patel, PharmD, BCPS<sup>1</sup>; Nicole Saccone, PharmD<sup>2</sup>; Kent Stock, MD<sup>1</sup>; Sara Utley, PharmD, BCPS<sup>1</sup>; Dawn Bouknight, PharmD, BCPS<sup>1</sup>; <sup>1</sup>Roper St Francis, Charleston, South Carolina; <sup>2</sup>MUSC, Charleston, South Carolina,

**Session:** 129. Antibiotic Stewardship: Allergy Evaluation

*Friday, October 4, 2019: 12:15 PM*

**Background.** Penicillin (PCN) allergy has been approximated to be reported in 10% of the United States population. Studies utilizing PCN skin testing have demonstrated that less than 1% of the population have a true PCN allergy. With increasing data on the negative consequences associated with a PCN allergy diagnosis, correctly identifying these patients is imperative. PCN skin testing has resulted in high rates of penicillin de-labeling; however, there are limited data evaluating the impact of a pharmacist-led PCN allergy evaluation with removal through utilization of oral challenges. The aim of this study was to utilize pharmacists to correctly identify those who are not penicillin-allergic to help decrease unnecessary use of broad-spectrum antibiotics and to optimize therapy.

**Methods.** This is a single-center, prospective review looking at a 10-month period of a pharmacist-led de-labeling project of patients with a PCN allergy. The electronic medical record system and decision support software were used to identify eligible patients. Adults  $\geq 18$  years of age with a PCN allergy were included. During the evaluation, pharmacists utilized a series of standardized questions which was reviewed with the infectious disease physician to classify the patient's allergy. Based on classification a protocol was followed that either led to the patient retaining their allergy, or removal. The primary objective is to evaluate the rate of removal of penicillin allergies. Secondary objectives reviewed removal rate of patients on active antibiotics, and evaluate how many were switched to  $\beta$ -lactam.

**Results.** A total of 492 patients with PCN allergies were interviewed by a pharmacist. Pharmacist de-labeled 99/492 (20%) PCN allergies. Of those patients, 23% were removed through oral challenge and 76% through patient history. There were 175 patients on active antibiotics and 52/175 (30%) had their allergies removed. Finally, 36/52 (69%) were switched to a  $\beta$ -lactam.

**Conclusion.** A pharmacist-led penicillin allergy de-labeling project is beneficial in reducing PCN allergies when skin testing is unavailable in community hospitals. As seen about 1 in 5 patients were able to remove their allergy through allergy evaluation or oral challenge. Furthermore, pharmacist evaluation of the allergy not only helped remove the allergy but also resulted in the most appropriate antibiotic.

SF PCN Allergy Project

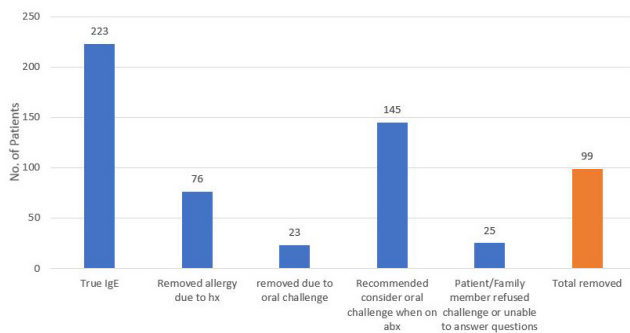

**Disclosures.** All authors: No reported disclosures.

### 999. Examining the Impact of a Penicillin Allergy Skin Testing Brochure on Inpatient Perceptions: a Pre-Post Intervention Study

Mikaela Brown, PharmD<sup>1</sup>; Joy Uzoma, PharmD Candidate<sup>2</sup>; Ryan P. VanSice, Pharm D Candidate<sup>2</sup>; Kelly M. Conn, PhD, MPH<sup>3</sup>; Allison Ramsey, MD<sup>4</sup>; Mary L. Staicu, PharmD<sup>2</sup>; <sup>1</sup>Wegmans School of Pharmacy, Richford, New York; <sup>2</sup>Rochester General Hospital, Rochester, New York; <sup>3</sup>St. John Fisher College, Wegmans School of Pharmacy, Rochester, New York; <sup>4</sup>Rochester Regional Health, Rochester, New York,

**Session:** 129. Antibiotic Stewardship: Allergy Evaluation

*Friday, October 4, 2019: 12:15 PM*

**Background.** Despite the negative implications associated with a penicillin (PCN) allergy label, less than 0.1% of ~25 million subjects with PCN allergy undergo a PCN skin testing (PST). There is a lack of data assessing patient knowledge and attitude about PCN allergy and PST. The purpose of this study was to evaluate the impact of an educational brochure on knowledge and perception of PST in adult inpatients with a PCN allergy label.

**Methods.** This was a pre-post intervention study conducted at a 528-bed community teaching hospital between June 2016 and March 2019. An electronic medical record was used to identify adult inpatients with an active PCN allergy. Participants completed a pre-brochure survey to assess demographic characteristics and baseline knowledge of PCN allergy and PST. Individuals then read an educational brochure, returned it to study personnel and were provided a post-brochure survey to complete. The primary and secondary outcomes of knowledge and perception were measured based on the level of agreement with statements about PCN allergies and PST using a 5-point Likert scale. McNemar's test was used to compare responses for those who agreed vs. did not agree to knowledge statements.

**Results.** Among 125 patients approached, 101 completed the survey (80.8%). Patients were predominantly female (66.3%), >65 years of age (42.6%), Caucasian (78.2%) and completed high school or beyond (81.2%). The minority of patients (40.6%) previously heard about PST while 25.7% agreed they had previous discussions about PST with a healthcare provider. Only 24.8% agreed that people can outgrow a PCN allergy at baseline; however, after reading the brochure, this percent tripled (77.2%) ( $P < 0.01$ ). Among 56 participants who disagreed that PST would be helpful for them at baseline, 30 subsequently agreed with this statement on the post-brochure survey ( $P < 0.001$ ). Post-brochure, 86.1% indicated they felt better informed about PST. Despite this, 34.7% indicated they would be scared to use PCN again if future PST results were negative.

**Conclusion.** An educational brochure improved general knowledge of PCN allergy and PST, including subject report of feeling more informed. Although the brochure successfully educated patients, gaps remain regarding how individuals will personally apply this new information.

**Disclosures.** All authors: No reported disclosures.

### 1000. The Impact of Pharmacy Students Performing Penicillin Allergy Reconciliation in a Community Health System

Bruce M. Jones, PharmD, BCPS<sup>1</sup>; Kelly Gamble<sup>2</sup>; Summer Sizemore<sup>2</sup>; Christopher M. Bland, PharmD, FCCP, FIDSA, BCPS<sup>2</sup>; <sup>1</sup>St. Joseph's/Candler Health System, Savannah, Georgia; <sup>2</sup>University of Georgia College of Pharmacy, Savannah, Georgia,

**Session:** 129. Antibiotic Stewardship: Allergy Evaluation

*Friday, October 4, 2019: 12:15 PM*

**Background.** Antimicrobial stewardship programs (ASP) play an important role in the assessment of patients with a reported history of penicillin allergy. Full-time pharmacists performing antimicrobial stewardship face many time barriers and limited resources to interviewing and investigating self-reported allergies. Pharmacy students on Advanced Pharmacy Practice Experience (APPE) rotations during their fourth year can potentially play an important role in this evaluation if properly trained, but data are limited. This study evaluated APPE student interventions on hospital inpatients self-reporting a penicillin allergy.

**Methods.** This quasi-experimental study assessed patients with a self-reported penicillin allergy who were interviewed by APPE students from October 2018 through March 2019. Students on a 5-week infectious diseases rotation were trained in allergy assessment and interview skills by their preceptor and given a daily list of all inpatients with a self-reported penicillin allergy. After reviewing patients with the preceptor, the electronic health record was updated with specifics of the allergy, including the range, reaction, and any  $\beta$ -lactams tolerated since. Interventions included penicillin re-challenge, graded challenge, penicillin skin testing, desensitization, or removal of the allergy. The primary outcome was interventions attributed to APPE student patient interviews.

**Results.** A total of 12 APPE students participated in the study. Reported reactions ranged from mild allergies (itching, rash) or adverse reactions (nausea, vomiting) to intermediate or severe allergies (hives, anaphylaxis). For the primary outcome there were 162 interventions performed, with 154 verbal, 2 re-challenges, and 6 skin tests. For the verbal interventions, 95 had their allergy updated, 34 removed, and 33 confirmed. None of the 8 patients who were skin tested or re-challenged had a subsequent reaction.

**Conclusion.** Pharmacy students can expand ASP allergy reconciliation services for patients with penicillin allergies in settings with limited resources. After proper training, students were effective in multiple aspects of allergy reconciliation with a significant number able to have their penicillin allergy removed.

**Disclosures.** All authors: No reported disclosures.

### 1001. Feasibility and Outcomes of a Pre-Transplant Antibiotic Allergy Evaluation Program for Allogeneic Hematopoietic Cell Transplant (HCT) Candidates

Catherine Liu, MD<sup>1</sup>; Elizabeth M. Krantz, MS<sup>2</sup>; Erica J. Stohs, MD, MPH<sup>3</sup>; Hannah Imlay, MD<sup>4</sup>; Lahari Rampur, MD<sup>5</sup>; Ania Sweet, PharmD, BCOP<sup>6</sup>; Jacquelyn C. Zier, BA<sup>1</sup>; Steven A. Pergam, MD, MPH<sup>1</sup>;
